# Supplementary material for: Surface characteristics of thin film composite polyamide membranes dictate silver nanoparticle loading efficacy
Source: Royal Society of Chemistry journal article supplement (doi:10.1039/d4lf00088a), 2024-01-01
Supplement: d4lf00088a1.pdf [file d4lf00088a1.pdf]

## ***Supporting Information for***

### **Surface Characteristics of Thin Film Composite Polyamide Membranes Dictate Silver Nanoparticle Loading Efficacy**

Afsana Munni<sup>1,2,3</sup>, Mohammed A. Bashammakh<sup>1,2</sup>, Marion Bellier<sup>1,2</sup>, Ali Ansari<sup>1,3</sup>,  
Mohamed E. A. Ali<sup>1,2,4</sup>, H. Enis Karahan<sup>1,2,5</sup>, Rafiqul Islam<sup>3</sup>, Treavor H. Boyer<sup>1</sup>,  
François Perreault<sup>1,2,6,\*</sup>

<sup>1</sup>School of Sustainable Engineering and the Built Environment, Arizona State University, Tempe, AZ 85287, United States

<sup>2</sup>Nanosystems Engineering Research Center for Nanotechnology-Enabled Water Treatment, Arizona State University, Tempe, AZ 85287, United States

<sup>3</sup>Cactus Materials Inc., Tempe, AZ 85282, United States

<sup>4</sup>Egypt Desalination Research Center of Excellence (EDRC) & Hydrogeochemistry Department, Desert Research Center, Cairo, 11753, Egypt

<sup>5</sup>CNRS, Immunology, Immunopathology and Therapeutic Chemistry, UPR 3572, 67000 Strasbourg, France

<sup>6</sup>Department of Chemistry, University of Quebec in Montreal, CP 8888, Succ. Centre-Ville, Montreal, QC, H3C 3P8, Canada

\* Corresponding Author: François Perreault, Email: [perreault.francois@uqam.ca](mailto:perreault.francois@uqam.ca)

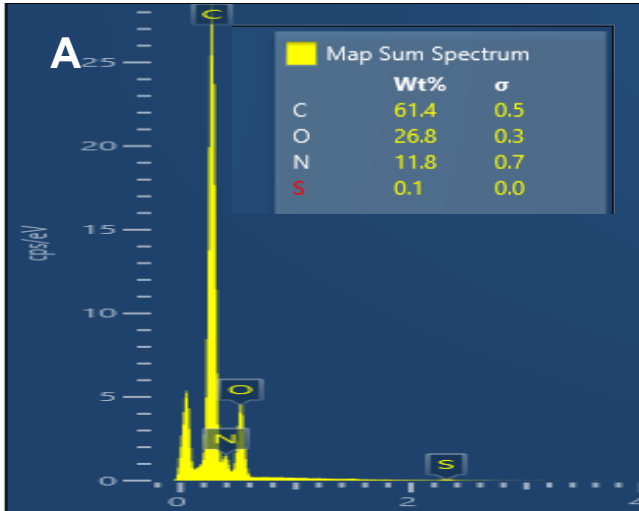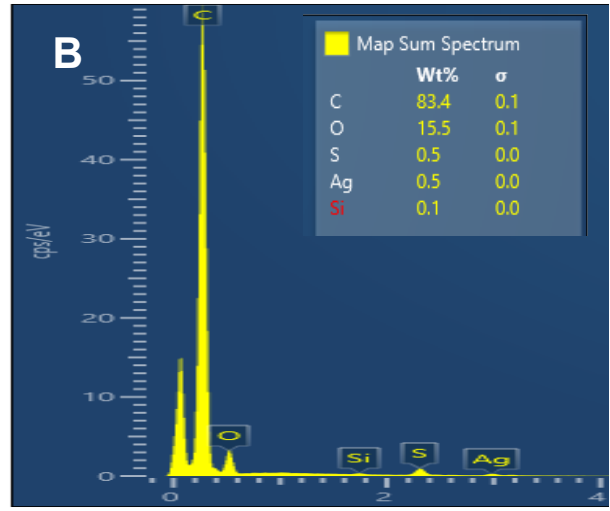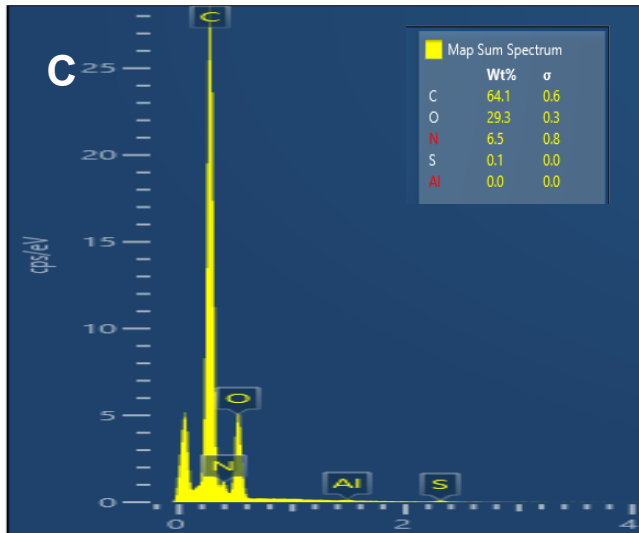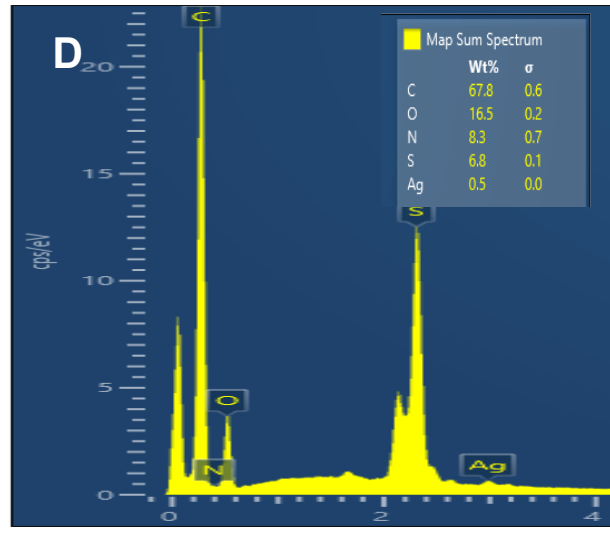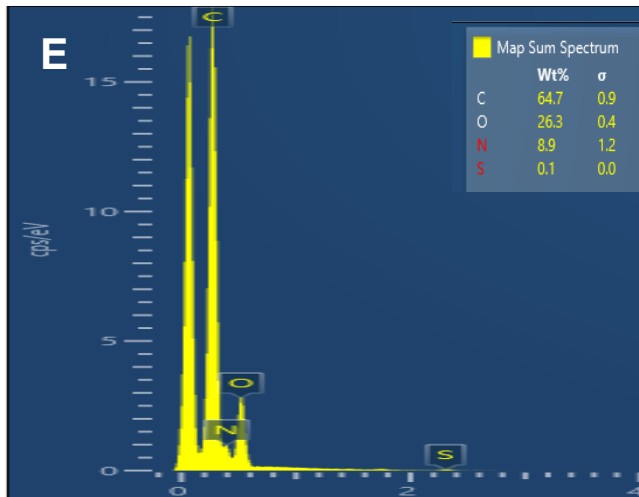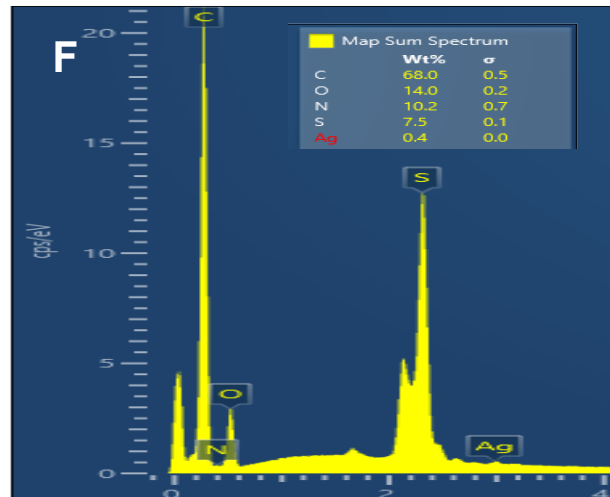

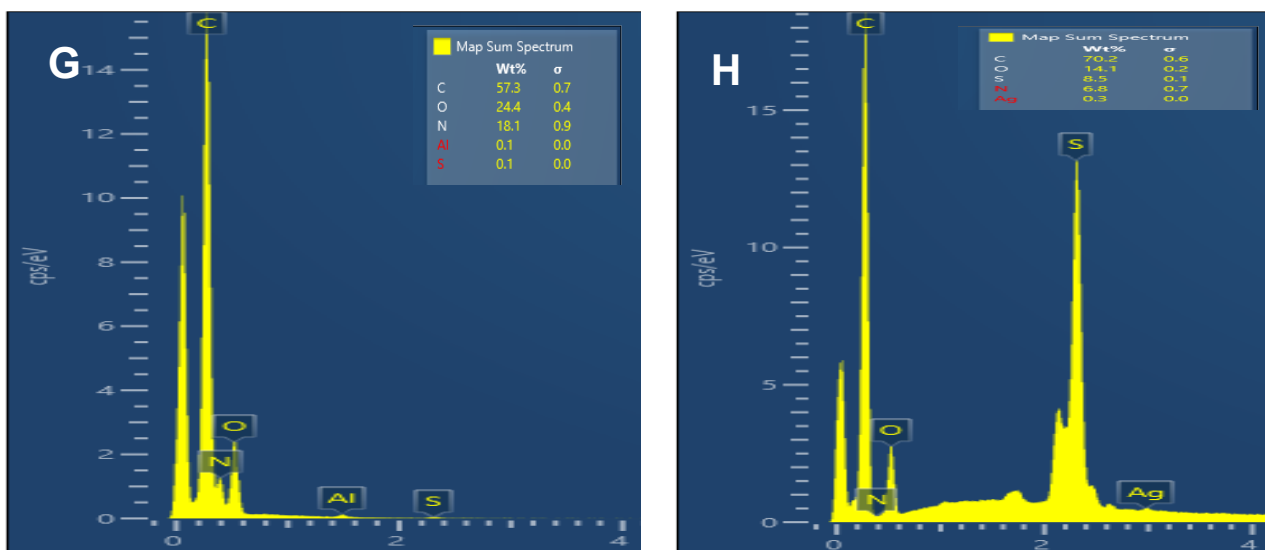

**Figure S1.** EDS spectra of (A,C,E,G) pristine and (B,D,F,H) AgNP-loaded SW 30, BW 30, AMI H, and NF 270 membranes.

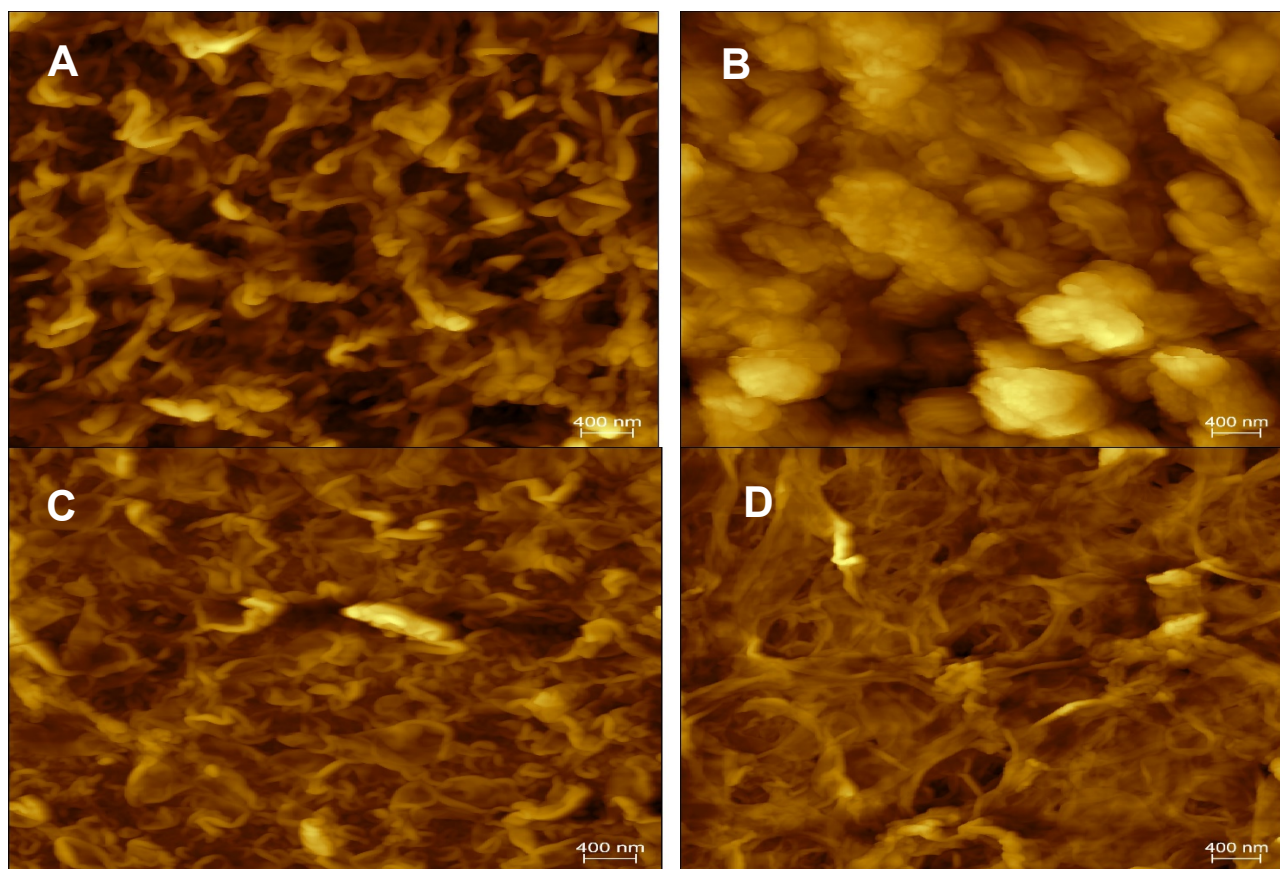

**Figure S2.** AFM-based surface topography images of pristine membranes (A) BW 30, (B) SW 30, (C) AMI H, and (D) NF 270.

**Table S1.** Summary of antimicrobial efficacy and water flux with silver loading by functionalizing different functional components.

| AgNPs preparation                                             | Materials        | Required amount                                                                               | Loading $\mu\text{g}/\text{cm}^2$ | Bacterial inactivation %                                                       | Water permeability coefficient $\text{L m}^{-2} \text{h}^{-1} \text{bar}^{-1}$ | Salt rejection coefficient $\text{L m}^{-2} \text{h}^{-1}$ | Ref.       |         |
|---------------------------------------------------------------|------------------|-----------------------------------------------------------------------------------------------|-----------------------------------|--------------------------------------------------------------------------------|--------------------------------------------------------------------------------|------------------------------------------------------------|------------|---------|
| precursor: $\text{AgNO}_3$<br>reducing agent: $\text{NaBH}_4$ | -                | -                                                                                             | -                                 | -                                                                              | pristine: $2.41 \pm 0.14$                                                      | pristine: $0.28 \pm 0.05$                                  | [1]        |         |
|                                                               | SW 30            | 1:1 mM                                                                                        | $0.8 \pm 0.02$                    | $90.7 \pm 3.8\%$ ( <i>E. coli</i> )                                            | $2.12 \pm 0.20$                                                                | $0.22 \pm 0.01$                                            |            |         |
|                                                               |                  | 2:2 mM                                                                                        | $1.5 \pm 0.03$                    | $91.2 \pm 2.6\%$ ( <i>E. coli</i> )                                            | $2.01 \pm 0.10$                                                                | $0.21 \pm 0.02$                                            |            |         |
|                                                               |                  | 5:5 mM                                                                                        | $3.7 \pm 0.4$                     | $90.7 \pm 3.8\%$ ( <i>E. coli</i> )                                            | $2.01 \pm 0.12$                                                                | $0.27 \pm 0.02$                                            |            |         |
|                                                               | cellulose fibers | 100:800 mM                                                                                    | 13.4                              | almost 100% ( <i>E. coli</i> )                                                 | -                                                                              | -                                                          | [2]        |         |
|                                                               | blotting paper   | 10:1 mM                                                                                       | $2.2 \pm 0.7$                     | CFU/mL reduced from $10^9$ to $10^5$ ( <i>E. coli</i> )                        | -                                                                              | -                                                          | -          | [3],[4] |
|                                                               |                  | 25:1 mM                                                                                       | $6.0 \pm 1.4$                     |                                                                                |                                                                                |                                                            |            |         |
|                                                               | stainless steel  | 300:300 mM                                                                                    | 1.463                             | CFU decreased from 60.9% to 25.1% ( <i>E. coli</i> )                           | -                                                                              | -                                                          | [5]        |         |
|                                                               | BW 30            | 3:3 mM                                                                                        | $4.1 \pm 0.16$                    | -                                                                              | -                                                                              | -                                                          | this study |         |
|                                                               | SW 30            | 3:3 mM                                                                                        | $2.9 \pm 0.3$                     | -                                                                              | -                                                                              | -                                                          |            |         |
| AMI H                                                         | 3:3 mM           | $2.8 \pm 0.5$                                                                                 | -                                 | -                                                                              | -                                                                              |                                                            |            |         |
| NF 270                                                        | 3:3 mM           | $2.3 \pm 0.13$                                                                                | -                                 | -                                                                              | -                                                                              |                                                            |            |         |
| PDA+AgNP                                                      | XLE              | PDA: 0.4 g<br>$\text{AgNO}_3$ : 4 g/L                                                         | 0.2 to 13.3                       | $42.4 \pm 5.7\%$ ( <i>E. coli</i> )<br>$62.7 \pm 9.3\%$ ( <i>B. subtilis</i> ) | reduced from $54.3 \pm 1.4$ to $32.1 \pm 2.8$ $\text{L m}^{-2} \text{h}^{-1}$  | NaCl reduction reduced to ~10%                             | [6]        |         |
| Ag-zeolite coating using PVA and PDA                          | NF 90            | $\text{AgNO}_3$ : 0.1 N<br>zeolite: 0.05 g<br>PVA: 0.23 to 0.43 g<br>dopamine<br>HCl: 2 mg/mL | 1.85 to 3.75                      | CFU/mL reduced from $\sim 10^8$ to $\sim 10^5$ ( <i>P. aeruginosa</i> )        | -                                                                              | -                                                          | [7]        |         |
| GO/Ag                                                         | TFC FO           | GO: 100 mg,<br>$\text{AgNO}_3$ : 5mM<br>$\text{NaBH}_4$ : 5 mM                                | 4                                 | -                                                                              | water flux increase 3% for FO and 13% for RO                                   | decreased ~2.5% for FO and increased ~3.5% for RO          | [8]        |         |

**Table S2.** Binding energies and atomic percentages of bonds on pristine RO and NF membranes.

| Sample label | Peak @ 284.6 eV    |      | Peak @ 286.0 eV    |      | Peak @ 287.6 eV    |      |
|--------------|--------------------|------|--------------------|------|--------------------|------|
|              | $\delta_{BE}$ (eV) | %    | $\delta_{BE}$ (eV) | %    | $\delta_{BE}$ (eV) | %    |
| SW 30        | 1.9                | 78.2 | 0.8                | 14.8 | 1.2                | 6.9  |
| BW 30        | 2.0                | 53.8 | 2.0                | 40.7 | 1.8                | 5.9  |
| AMI H        | 2.4                | 60.7 | 0.8                | 10.9 | 2.3                | 14.3 |
| NF 270       | 3.0                | 63.5 | 3.0                | 20.1 | 3.2                | 16.4 |

## References

- [1] M. Ben-Sasson *et al.*, “In situ formation of silver nanoparticles on thin-film composite reverse osmosis membranes for biofouling mitigation,” *Water Res*, vol. 62, pp. 260–270, Oct. 2014, doi: 10.1016/j.watres.2014.05.049.
- [2] C. Zhu, J. Xue, and J. He, “Controlled in-situ synthesis of silver nanoparticles in natural cellulose fibers toward highly efficient antimicrobial materials,” *J Nanosci Nanotechnol*, vol. 9, no. 5, pp. 3067–3074, May 2009, doi: 10.1166/jnn.2009.212.
- [3] B. Swensson, M. Ek, and D. G. Gray, “In Situ Preparation of Silver Nanoparticles in Paper by Reduction with Alkaline Glucose Solutions,” *ACS Omega*, vol. 3, no. 8, pp. 9449–9452, Aug. 2018, doi: 10.1021/acsomega.8b01199.
- [4] T. A. Dankovich and D. G. Gray, “Bactericidal paper impregnated with silver nanoparticles for point-of-use water treatment,” *Environ Sci Technol*, vol. 45, no. 5, pp. 1992–1998, Mar. 2011, doi: 10.1021/es103302t.
- [5] K. Ranjbari *et al.*, “Controlling silver release from antibacterial surface coatings on stainless steel for biofouling control,” *Colloids Surf B Biointerfaces*, vol. 216, p. 112562, Aug. 2022, doi: 10.1016/J.COLSURFB.2022.112562.
- [6] Z. Yang, Y. Wu, J. Wang, B. Cao, and C. Y. Tang, “In situ reduction of silver by polydopamine: A novel antimicrobial modification of a thin-film composite polyamide membrane,” *Environ Sci Technol*, vol. 50, no. 17, pp. 9543–9550, Sep. 2016, doi: 10.1021/ACS.EST.6B01867/ASSET/IMAGES/LARGE/ES-2016-01867A\_0007.JPEG.
- [7] J. Wu, C. Yu, and Q. Li, “Novel regenerable antimicrobial nanocomposite membranes: Effect of silver loading and valence state,” *J Memb Sci*, vol. 531, pp. 68–76, 2017, doi: 10.1016/j.memsci.2017.02.047.
- [8] A. Soroush, W. Ma, M. Cyr, M. S. Rahaman, B. Asadishad, and N. Tufenkji, “In Situ Silver Decoration on Graphene Oxide-Treated Thin Film Composite Forward Osmosis Membranes: Biocidal Properties and Regeneration Potential,” *Environ Sci Technol Lett*, vol. 3, no. 1, pp. 13–18, Jan. 2016, doi:10.1021/acs.estlett.5b00304
